# Supplementary material
Source: PubMed Central journal article supplement (PMC1182439)
Supplement: pnas_0503658102_1.pdf [file pnas_0503658102_1.pdf]

**Table 1. Tyrosine phosphorylation and GD3 effects on the growth factor/receptors**

| <b>Growth factor/receptor</b> | <b>Tyrosine phosphorylation</b> | <b>GD3 effect*</b> |
|-------------------------------|---------------------------------|--------------------|
| FCS                           | +                               | +                  |
| PDGF/PDGF receptor            | -                               | -                  |
| basic FGF/FGF receptor        | -                               | -                  |
| EGF/EGF receptor              | +                               | ± <sup>†</sup>     |

PDGF, platelet-derived growth factor.

\*Enhanced tyrosine phosphorylation in GD3<sup>+</sup> cells with individual growth factors as analyzed with PY20.

<sup>†</sup>A 120-kDa unknown band was detected with higher intensity in the GD3<sup>+</sup> transfectants.
